# Supplementary material
Source: Springer Nature journal article supplement (https://www.springermedizin.de/resource/supplementary/12889_2012_4894_MOESM1_ESM.pdf/9494636)
Supplement: MOESM1 [file 9494636]

| <b>Key Informants</b>  | <b>Study Subjects</b>           |
|------------------------|---------------------------------|
| Therapeutic option     | Therapeutic option              |
| Financial compensation | Financial compensation          |
| Access to healthcare   |                                 |
| Altruism               | Altruism (secondary motivation) |
| Other                  |                                 |
